# Supplementary material for: Generative artificial intelligence causes displacement for white-collar workers but reduces regional opportunity disparities
Source: Research Square preprint supplement (doi:10.21203/rs.3.rs-5596705/v1), 2025-01-03
Supplement: Supplementary file 1 [file 782e55c73dc71d0cd5ffa750.docx]

Supplementary Material for

Generative artificial intelligence causes displacement for white-collar workers but reduces regional opportunity disparities

Jiayin Hu1 Lun Liu2,3,4 * Anqi Wang1 Zongyuan Weng2

1 China Center for Economic Research, National School of Development, Peking University, Beijing, 100871, China

2 School of Government, Peking University, Beijing, 100871, China

3 Institute of Public Governance, Peking University, Beijing, 100871, China

4 PKU-Wuhan Institute for Artificial Intelligence, Wuhan, Hubei, 430075, China

* Corresponding author. E-mail: [liu.lun@pku.edu.cn](mailto:liu.lun@pku.edu.cn)

Contents

S1 Supplementary Information

S2 Supplementary Tables: Tables S1 to S7

S3 Supplementary Figures: Figures S1 to S2

SI References

# S1 Supplementary Information

## S1.1 Classification of work activities in O*NET

The O*NET database provides four hierarchical levels of classification for job content: tasks, Detailed Work Activities (DWAs), Intermediate Work Activities (IWAs), and Generalized Work Activities (GWAs). For instance, the occupation "Electrician" includes several specific tasks, such as “Prepare sketches or follow blueprints, locate electrical wiring or equipment, and ensure compliance with building and safety codes” and “Provide preliminary sketches or cost estimates for materials or services.” O*NET collects these tasks through field surveys and interviews, totaling approximately 20,000 individual items. Subsequently, O*NET clusters similar tasks into about 2,000 DWAs. For example, the aforementioned tasks might be grouped under the same DWA, such as “Create Architectural or Installation Drawings.” Above this level, there are approximately 300 IWAs and 41 GWAs, which provide broader categorizations of work activities.

## S1.2 Urban labor market characteristics examined for their association with resilience to GenAI

This study builds on existing research concerning the economic resilience of Chinese cities by selecting labor market variables closely related to urban resilience and conducting a correlation analysis to explore their impact on cities' responses to external economic shocks1-3. The selected variables include occupational diversity, average wages, city-level economic size, occupational similarity, the development level of industrial structure, economic density, and population density. The following sections provide a detailed discussion of the measurement of these variables and their theoretical foundations.

First, a city's economic foundation is fundamental to its ability to withstand external shocks and recover effectively. Cities with stronger economic bases, characterized by larger city-level GDP and higher per capita GDP, are better positioned to absorb the negative impacts of economic disruptions and leverage local markets for adjustment and recovery1. A robust economic foundation signifies a large local market, characterized by broad consumer demand and multiple economic opportunities, which can effectively accommodate shifts during periods of change. These diverse economic opportunities create a more resilient environment, allowing for labor market flexibility—such as the movement of workers from heavily impacted sectors to those that are less affected—thus minimizing the impact of external shocks on employment and overall economic activity. The capacity for such labor market self-adjustment, enabled by a strong economic foundation, is crucial for ensuring that cities can efficiently respond to disruptions. City-level GDP and per capita GDP are used as primary indicators of economic strength, with the original data sourced from the 2023 "China City Statistical Yearbook."

Second, to assess the economic characteristics of cities comprehensively, this study includes economic density and population density as key indicators. Economic density, defined as the ratio of city-level GDP to land area, and population density, defined as the ratio of city-level population to land area, provide insights into the effects of agglomeration economies. High economic density implies concentrated economic activities, which supports efficient infrastructure use, enhances business interactions, and lowers transaction costs, all of which contribute to a city's ability to handle economic stress. Similarly, high population density improves labor market efficiency by fostering proximity between workers and firms, which accelerates information flow, reduces matching costs, and supports rapid industrial adaptation. These characteristics help cities respond swiftly to economic fluctuations, as dense environments facilitate faster technology adoption and innovation diffusion, thereby strengthening urban resilience.4 Data for economic density and population density are primarily sourced from the 2023 "China City Statistical Yearbook." Specifically, data on GDP, population, and land area are mostly derived from this yearbook. However, for cities with missing population or land area data, supplementary information is obtained from the respective local statistical bureaus at the prefecture level.

Third, the city’s wage levels are a key determinant of a city's resilience to GenAI-induced displacement. Higher wages typically imply higher labor costs, creating stronger incentives for employers to adopt GenAI technologies to reduce expenses5. This makes regions with higher wages more vulnerable to automation, as employers are likely to substitute costly labor with AI-driven solutions, thereby reducing resilience. Moreover, high-wage occupations often involve specialized skills that may not easily transfer to other sectors, limiting the adaptability of the workforce when displacement occurs. Therefore, while high wages indicate economic prosperity, they also heighten the risk of job displacement, as both economic incentives for automation and the specificity of skills hinder rapid labor market adjustment. The wage data for this analysis are sourced from the statistical bureaus of various prefecture-level cities.

Fourth, the development level of a city's industrial structure is another critical factor influencing resilience to GenAI displacement. This study measures the evolution of industrial structure using the following formula:

(1)

where ​, , and represent the value-added of tertiary, secondary, and primary industries, respectively, in city at time . This formula reflects a shift from low- to high-value-added activities, emphasizing the transition towards a service-oriented economy. An increasing share of the tertiary sector often indicates that a city is progressing towards a later stage of industrialization, characterized by greater diversification and more robust innovation ecosystems6. Such a shift enhances resilience by fostering Jacobs externalities, which promote technological diffusion, knowledge sharing, and adaptive capacity. Cities with a more advanced industrial structure are therefore better equipped to withstand the displacement impacts of GenAI by leveraging the broader opportunities for innovation and the diverse skill sets required in the service sector. The data for the value-added of each industry are sourced from the 2023 "China City Statistical Yearbook."

Fifth, occupational diversity and occupational similarity are critical factors influencing a city's resilience to GenAI-induced displacement. Occupational diversity reflects the availability of a broad spectrum of job opportunities with differing levels of exposure to GenAI. The key role of diversity is to ensure that, alongside jobs highly susceptible to AI displacement, there are also positions with lower exposure levels, thereby providing displaced workers with opportunities to transition to less vulnerable roles. The availability of these lower-exposure jobs is essential, as it allows for flexible workforce reallocation, mitigating the negative impacts of AI-induced displacement.

Occupational similarity contributes to resilience by facilitating the rapid redeployment of skills, knowledge, and abilities across sectors. When there is a high degree of overlap in skill requirements among occupations, workers displaced from one industry can more easily shift to another, increasing the labor market's overall adaptive capacity. This ability to reallocate human capital is particularly important in the context of economic shocks induced by GenAI. However, local industries may also be linked through input-output relationships, which means that if a region's production system is highly vertically integrated, an industry-specific shock can propagate through these linkages, potentially weakening regional resilience7.To quantify occupational similarity, we use O*NET's skill data to assess the similarity between the skill sets required for occupations and , using the following formula:

(2)

where ​ represents the skill profile of occupation . The occupational similarity score is scaled to fall within the range of 0 to 1, with a higher value indicating greater similarity. In this analysis, O*NET variables related to abilities, interests, knowledge, skills, work activities, work environments, education, training, and experience are utilized to assess the significance of 232 distinct workplace skills across 775 different occupations. Both occupational diversity and occupational similarity are initially calculated at the occupation level and subsequently aggregated to the city level using a weighted average, providing a comprehensive analysis of factors influencing urban resilience.

In selecting the variables for analysis, the correlations among potential factors were thoroughly assessed (Table S1). City-level wages and occupational diversity were ultimately chosen because both variables were statistically significant and their signs were consistent with theoretical expectations. Specifically, city-level wages showed a negative association with resilience, indicating that higher wages may increase vulnerability to GenAI displacement due to higher substitution incentives. In contrast, occupational diversity had a positive relationship with resilience, as a diverse labor market offers more opportunities for workers to transition to less exposed roles. These two variables thus best captured the dynamics of how wage structures and labor market flexibility influence a city's ability to adapt to GenAI-induced disruptions.

# S2 Supplementary Tables

| **Table S1. Correlation between labor market characteristics and resilience to GenAI** | | | | | | | | | | |
| --- | --- | --- | --- | --- | --- | --- | --- | --- | --- | --- |
| Variable | (1) | (2) | (3) | (4) | (5) | (6) | (7) | (8) | (9) | (10) |
| (1) | 1.000 |  |  |  |  |  |  |  |  |  |
| (2) | 0.176 | 1.000 |  |  |  |  |  |  |  |  |
| 0.102 |  |  |  |  |  |  |  |  |  |
| (3) | 0.022 | 0.295 | 1.000 |  |  |  |  |  |  |  |
| 0.840 | 0.005 |  |  |  |  |  |  |  |  |
| (4) | 0.091 | -0.056 | 0.237 | 1.000 |  |  |  |  |  |  |
| 0.514 | 0.688 | 0.085 |  |  |  |  |  |  |  |
| (5) | 0.101 | -0.122 | 0.323 | 0.723 | 1.000 |  |  |  |  |  |
| 0.400 | 0.308 | 0.006 | 0.000 |  |  |  |  |  |  |
| (6) | 0.136 | -0.295 | 0.318 | 0.681 | 0.748 | 1.000 |  |  |  |  |
| 0.255 | 0.012 | 0.007 | 0.000 | 0.000 |  |  |  |  |  |
| (7) | 0.712 | -0.246 | -0.011 | 0.003 | 0.060 | 0.111 | 1.000 |  |  |  |
| 0.000 | 0.021 | 0.923 | 0.982 | 0.614 | 0.352 |  |  |  |  |
| (8) | 0.065 | -0.191 | 0.082 | 0.210 | 0.048 | 0.237 | 0.108 | 1.000 |  |  |
| 0.586 | 0.109 | 0.495 | 0.152 | 0.688 | 0.045 | 0.365 |  |  |  |
| (9) | 0.026 | -0.189 | 0.163 | 0.623 | 0.512 | 0.765 | 0.008 | 0.149 | 1.000 |  |
| 0.828 | 0.112 | 0.173 | 0.000 | 0.000 | 0.000 | 0.946 | 0.213 |  |  |
| (10) | 0.055 | -0.231 | 0.249 | 0.591 | 0.407 | 0.658 | 0.000 | 0.118 | 0.772 | 1.000 |
| 0.648 | 0.051 | 0.035 | 0.000 | 0.000 | 0.000 | 0.998 | 0.322 | 0.000 |  |
| Residuals | -0.214 | **0.295** | -0.007 | **-0.499** | -0.511 | -0.530 | -0.214 | -0.098 | -0.359 | -0.377 |
| 0.045 | **0.005** | 0.946 | **0.000** | 0.000 | 0.000 | 0.045 | 0.411 | 0.002 | 0.001 |
| Expected | + | **+** | + | **-** | + | + | + | - | + | + |
| Notes: (1) Each cell contains two numbers: the first represents the Pearson correlation coefficient between the respective variables, and the second is the corresponding p-value. (2) Variables 1 to 10 are: Occupational Diversity, Occupational Diversity Excluding First Quartile Exposure Jobs, Occupational Diversity Excluding the Bottom Two Exposure Levels, Average Wage, Per Capita GDP in the city, GDP in the city, Occupational Similarity, Level of Industrial Development, Economic Density, and Population Density. | | | | | | | | | | |

**Table S2. Occupational GenAI exposure indices**

| Occupation | GenAI exposure index |
| --- | --- |
| Community/Resident/Homemaking Services | 0.093 |
| Technician/Operator | 0.141 |
| Cooking/Culinary/Food R&D | 0.157 |
| Transportation Services | 0.261 |
| Logistics/Warehousing | 0.305 |
| Agriculture | 0.350 |
| Chemical Industry | 0.361 |
| Hospital/Medical/Nursing | 0.386 |
| Civil Engineering/Construction/Renovation | 0.407 |
| Electronics/Electrical Appliances/Semiconductors/Instrumentation | 0.439 |
| Property Management | 0.447 |
| Mechanical Design/Manufacturing/Maintenance | 0.450 |
| Quality Management/Safety Protection | 0.459 |
| Hardware Development | 0.472 |
| Film/Media/Publishing/Printing | 0.491 |
| Production Management/Operations | 0.503 |
| Energy/Minerals/Geological Survey | 0.509 |
| Health/Beauty/Hairdressing/Fitness | 0.518 |
| Supermarket/Hotel/Entertainment Management/Services | 0.527 |
| Travel/Vacation/Immigration Services | 0.543 |
| Procurement/Trade | 0.561 |
| Administration/Logistics/Secretarial | 0.573 |
| Art/Design | 0.580 |
| Car Sales and Services | 0.593 |
| Environmental Science/Environmental Protection | 0.603 |
| Human Resources | 0.606 |
| Project Management/Project Coordination | 0.608 |
| Senior Management | 0.609 |
| Biology/Pharmaceuticals/Medical Devices | 0.610 |
| Telecommunications/Communication Technology Development and Application | 0.611 |
| IT Operations/Technical Support | 0.617 |
| Consulting/Advisory/Research/Data Analysis | 0.677 |
| Civil Servant/Institution/Research Institution | 0.678 |
| Internet Product/Operation Management | 0.693 |
| Education/Training | 0.695 |
| Marketing | 0.696 |
| Apparel/Textile/Leather Design/Production | 0.697 |
| Sales Management | 0.702 |
| Lawyer/Legal/Compliance | 0.711 |
| Real Estate Development/Brokerage/Agency | 0.717 |
| Advertising/Exhibition | 0.723 |
| IT Management/Project Coordination | 0.750 |
| Sales Administration/Business | 0.753 |
| IT Quality Management/Testing/Configuration Management | 0.766 |
| Automobile Manufacturing | 0.768 |
| Customer Service/Technical Support | 0.793 |
| Software/Internet Development/System Integration | 0.794 |
| Securities/Futures/Investment Management/Services | 0.795 |
| Banking | 0.795 |
| Sales | 0.797 |
| Insurance | 0.802 |
| Translation | 0.816 |
| PR/Media | 0.816 |
| Finance/Audit/Taxation | 0.881 |

| **Table S3. Robustness check of the results on the impact of GenAI on labor demand (using August 2022 as the reference point)** | | | | | |
| --- | --- | --- | --- | --- | --- |
|  | (1) | (2) | (3) | (4) | (5) |
|  | Ratio of Number of posts to 2022.08 | | | | |
| VARIABLES | total | 2022.11-2023.02 | 2023.03-2023.006 | 2023.07-2023.10 | 2023.10-2024.02 |
| Panel A. OLS |  |  |  |  |  |
| GenAI exposure | -0.131*** | -0.016 | -0.073 | -0.217*** | -0.214*** |
|  | (0.033) | (0.045) | (0.061) | (0.065) | (0.077) |
|  |  |  |  |  |  |
| Economic sectoral trends | YES | YES | YES | YES | YES |
| Obs. | 782 | 184 | 184 | 184 | 184 |
| Adjusted R-squared | 0.029 | 0.001 | 0.063 | 0.061 | 0.042 |
| Panel B. IV |  |  |  |  |  |
| GenAI exposure | -0.309*** | -0.045 | -0.264*** | -0.451*** | -0.469*** |
|  | (0.048) | (0.065) | (0.089) | (0.097) | (0.113) |
|  |  |  |  |  |  |
| Economic sectoral trends | YES | YES | YES | YES | YES |
| Obs. | 782 | 184 | 184 | 184 | 184 |
| Notes: (1) Standard errors are in brackets (2) Statistical significance at the 1%, 5%, and 10% levels is indicated by ***, **, and *, respectively. (3) Data source: Zhaopin.com. (4) The sample period is from 2022.10 to 2024.02. (5) Regressions in Panel A use Ordinary Least Squares (OLS) while Panel B uses Instrumental Variables (IV) estimation. The IV is Felten-LLM index. (6) All models include the industry output to control for unobserved heterogeneity. | | | | | |

| **Table S4. Robustness check of the results on the impact of GenAI on labor demand (using September 2022 as the reference point)** | | | | | |
| --- | --- | --- | --- | --- | --- |
|  | (1) | (2) | (3) | (4) | (5) |
|  | Ratio of Number of posts to 2022.09 | | | | |
| VARIABLES | total | 2022.11-2023.02 | 2023.03-2023.006 | 2023.07-2023.10 | 2023.10-2024.02 |
| Panel A. OLS |  |  |  |  |  |
| GenAI exposure | -0.085** | 0.033 | -0.027 | -0.173** | -0.172** |
|  | (0.033) | (0.042) | (0.063) | (0.067) | (0.077) |
|  |  |  |  |  |  |
| Economic sectoral trends | YES | YES | YES | YES | YES |
| Obs. | 736 | 184 | 184 | 184 | 184 |
| Adjusted R-squared | 0.013 | 0.004 | 0.043 | 0.037 | 0.027 |
| Panel B. IV |  |  |  |  |  |
| GenAI exposure | -0.204*** | 0.0662 | -0.156* | -0.348*** | -0.371*** |
|  | (0.048) | (0.061) | (0.092) | (0.098) | (0.112) |
|  |  |  |  |  |  |
| Economic sectoral trends | YES | YES | YES | YES | YES |
| Obs. | 736 | 184 | 184 | 184 | 184 |
| Notes: (1) Standard errors are in brackets (2) Statistical significance at the 1%, 5%, and 10% levels is indicated by ***, **, and *, respectively. (3) Data source: Zhaopin.com. (4) The sample period is from 2022.10 to 2024.02. (5) Regressions in Panel A use Ordinary Least Squares (OLS) while Panel B uses Instrumental Variables (IV) estimation. The IV is Felten-LLM index. (6) All models include the industry output to control for unobserved heterogeneity. | | | | | |

| **Table S5. Robustness check of the results on the impact of GenAI on labor demand (deleting education and automobile production)** | | | | | |
| --- | --- | --- | --- | --- | --- |
|  | (1) | (2) | (3) | (4) | (5) |
|  | Ratio of Number of posts to 2022.10 (deleting education and automobile production) | | | | |
| VARIABLES | total | 2022.11-2023.02 | 2023.03-2023.006 | 2023.07-2023.10 | 2023.10-2024.02 |
| Panel A. OLS |  |  |  |  |  |
| GenAI exposure | -0.130*** | 0.000 | -0.087 | -0.227*** | -0.203** |
|  | (0.038) | (0.044) | (0.076) | (0.078) | (0.085) |
|  |  |  |  |  |  |
| Economic sectoral trends | YES | YES | YES | YES | YES |
| Obs. | 704 | 176 | 176 | 176 | 176 |
| Adjusted R-squared | 0.037 | 0.012 | 0.094 | 0.058 | 0.035 |
| Panel B. IV |  |  |  |  |  |
| GenAI exposure | -0.317*** | -0.039 | -0.268*** | -0.465*** | -0.493*** |
|  | (0.047) | (0.063) | (0.087) | (0.096) | (0.112) |
|  |  |  |  |  |  |
| Economic sectoral trends | YES | YES | YES | YES | YES |
| Obs. | 704 | 176 | 176 | 176 | 176 |
| Notes: (1) Standard errors are in brackets (2) Statistical significance at the 1%, 5%, and 10% levels is indicated by ***, **, and *, respectively. (3) Data source: Zhaopin.com. (4) The sample period is from 2022.10 to 2024.02. (5) Regressions in Panel A use Ordinary Least Squares (OLS) while Panel B uses Instrumental Variables (IV) estimation. The IV is Felten-LLM index. (6) All models include the industry output to control for unobserved heterogeneity. (7) “Education and training” and “Automobile manufacturing” have been deleted from the sample, as they are more affected by external policy shocks. | | | | | |

| **Table S6. Regression to detrend economic sectoral trends from job posting dynamics** | |
| --- | --- |
| VARIABLES |  |
| Sectoral output | 0.040*** |
|  | (0.016) |
| Constant | 0.980***  (0.015) |
| Obs. | 20,483 |
| Adjusted R-squared | 0.0003 |
| Notes: (1) Standard errors are in brackets (2) Statistical significance at the 1%, 5%, and 10% levels is indicated by ***, **, and *, respectively. | |

| **Table S7. Regression results for evaluating labor market resilience to GenAI** | |
| --- | --- |
| Variables | Ratio of Number of postings to 2022.10 |
| GenAI exposure | --0.000** |
|  | (5.77e-06) |
| Economic sectoral trends | 0.534 |
|  | (0.448) |
| Obs. | 88 |
| Adjusted R-Squared | 0.057 |
| Notes: (1) Standard errors are in brackets (2) Statistical significance at the 1%, 5%, and 10% levels is indicated by ***, **, and *, respectively. (3) Data source: Zhaopin.com. (4) The sample period is from 2022.10 to 2024.02. | |

# S3 Supplementary Figures

**
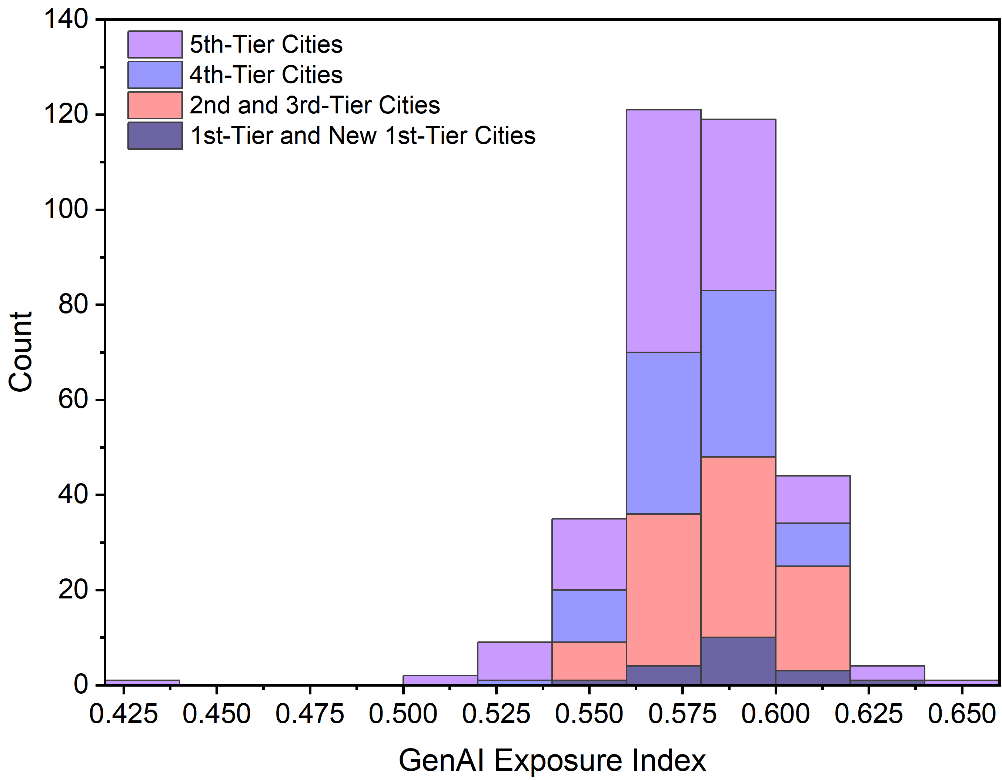
**

**Fig. S1. Distribution of city-level GenAI exposure**

**
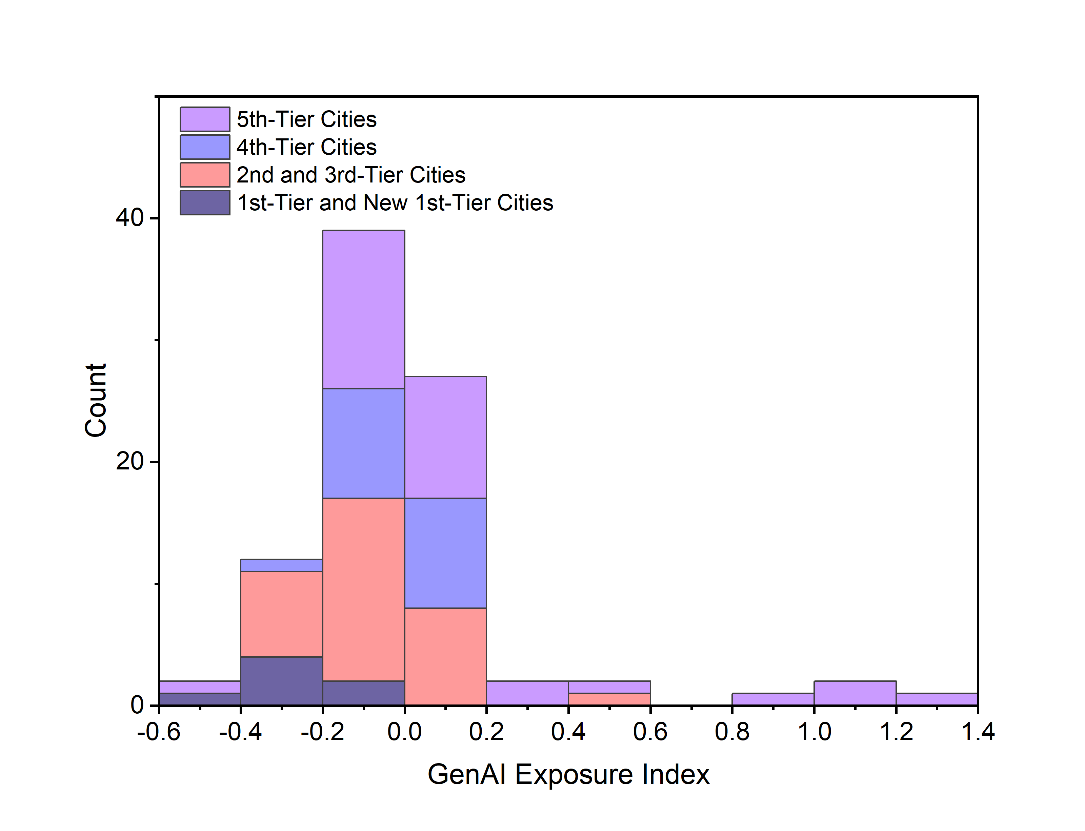
**

**Fig. S2. Distribution of city-level labor market resilience index**

# SI Reference

1. Wang, Z., Wei, W. Regional economic resilience in China: Measurement and determinants. *Reg Stud* **55**, 1228-1239 (2021).
2. Hu, X., Li, L., Dong, K. What matters for regional economic resilience amid COVID-19? Evidence from cities in Northeast China. *Cities* **120**, 103440 (2022).
3. Wang, X., Wang, L., Zhang, X., Fan, F. The spatiotemporal evolution of COVID-19 in China and its impact on urban economic resilience. *China Econ Rev* **74**, 101806 (2022).
4. Capello, R., Caragliu, A., Fratesi, U. Spatial heterogeneity in the costs of the economic crisis in Europe: are cities sources of regional resilience?. *J Econ Geogr* 15, 951-972 (2015).
5. Acemoglu, D., Restrepo, P. Artificial intelligence, automation, and work. In The economics of artificial intelligence: An agenda (pp. 197-236). *University of Chicago Press* (2018).
6. Martin, R. Regional economic resilience, hysteresis and recessionary shocks. *J Econ Geogr* 12(1), 1-32 (2012).
7. Cainelli, G., Ganau, R., Modica, M. Industrial relatedness and regional resilience in the European Union. *Pap Reg Sci* 98, 755-779 (2019).
